# Supplementary material for: Type I interferon receptor-independent and -dependent host transcriptional responses to mouse hepatitis coronavirus infection in vivo
Source: PubMed Central journal article supplement (PMC2728740; doi:10.1186/1471-2164-10-350), 2009-08-03
Supplement: 1471-2164-10-350-S1.pdf [file 1471-2164-10-350-S1.pdf]

**Supplementary Table 1A. Early genes (n=57)**

| <b>GeneID</b> | <b>Common Name</b>           | <b>RefSeq</b> | <b>BALB/c<br/>t=2</b> | <b>BALB/c<br/>t=5</b> | <b>129SvEv<br/>t=2</b> | <b>129SvEv<br/>t=5</b> |
|---------------|------------------------------|---------------|-----------------------|-----------------------|------------------------|------------------------|
| MMAA300004126 | 69717                        | XM_001003852  | <b>1,6</b>            | <b>2,8</b>            | 1,0                    | 1,0                    |
| MMAA300002620 | 1810023F06Rik                | NM_029803     | <b>4,4</b>            | <b>10,4</b>           | 1,1                    | 1,0                    |
| MMAA300008745 | B2m                          | NM_009735     | <b>2,2</b>            | <b>5,4</b>            | 1,3                    | 1,2                    |
| MMAA300017604 | Bst2                         | NM_198095     | <b>1,6</b>            | <b>2,1</b>            | 1,0                    | 1,0                    |
| MMAA200001340 | C1qc                         | NM_007574     | <b>1,5</b>            | <b>1,9</b>            | 1,1                    | 1,0                    |
| MMAA300009870 | Ccl12                        | NM_011331     | <b>1,7</b>            | <b>9,3</b>            | 1,2                    | 1,1                    |
| MMAA200009050 | Cxcl11                       | NM_019494     | <b>1,5</b>            | <b>6,1</b>            | 1,0                    | 1,0                    |
| MMAA300012414 | D11Erttd759e                 | NM_001040005  | <b>1,6</b>            | <b>2,9</b>            | 1,4                    | 1,0                    |
| MMAA200000807 | D12Erttd647e                 | NM_026790     | <b>2,7</b>            | <b>3,0</b>            | 1,1                    | 1,2                    |
| MMAA300004057 | ENSMUSESTG00003733703        |               | <b>1,8</b>            | <b>2,6</b>            | 1,0                    | 1,0                    |
| MMAA300012450 | ENSMUSG00000039955           |               | <b>1,9</b>            | <b>3,2</b>            | 1,3                    | 1,0                    |
| MMAA300012693 | Fbxo39                       | NM_001037713  | <b>2,0</b>            | <b>2,8</b>            | 1,1                    | 1,0                    |
| MMAA200000089 | Gbp1                         | NM_010259     | <b>2,7</b>            | <b>6,1</b>            | 1,1                    | 1,0                    |
| MMAA200004765 | Gbp2                         | NM_010260     | <b>2,4</b>            | <b>4,1</b>            | 1,1                    | 1,0                    |
| MMAA200000729 | Gbp3                         | NM_018734     | <b>3,5</b>            | <b>5,5</b>            | 1,3                    | 1,1                    |
| MMAA300006597 | Gbp4                         | NM_029509     | <b>5,3</b>            | <b>4,8</b>            | 1,1                    | 1,1                    |
| MMAA300017406 | genomic:17-45870359-45870428 |               | <b>6,1</b>            | <b>8,3</b>            | 1,1                    | 1,0                    |
| MMAA300011983 | H28                          | NM_031367     | <b>1,9</b>            | <b>2,1</b>            | 1,1                    | 1,0                    |
| MMAA300004062 | H2-K1                        | NM_019909     | <b>7,2</b>            | <b>4,9</b>            | 1,1                    | 1,2                    |
| MMAA300012864 | H2-Q1                        |               | <b>1,7</b>            | <b>3,2</b>            | 1,1                    | 1,1                    |
| MMAA300010152 | H2-Q10                       | NM_010391     | <b>2,3</b>            | <b>3,3</b>            | 0,9                    | 1,0                    |
| MMAA300010147 | H2-Q8                        | NM_023124     | <b>1,6</b>            | <b>2,2</b>            | 1,0                    | 1,0                    |
| MMAA300006884 | Herc5                        | XM_978982     | <b>1,5</b>            | <b>2,4</b>            | 1,0                    | 1,0                    |
| MMAA300005162 | Ifi202b                      | NM_008327     | <b>2,2</b>            | <b>7,2</b>            | 1,5                    | 1,2                    |
| MMAA300005166 | Ifi204                       | NM_008329     | <b>1,5</b>            | <b>5,2</b>            | 1,2                    | 1,0                    |
| MMAA200006998 | Ifi44                        | NM_133871     | <b>4,3</b>            | <b>6,4</b>            | 1,2                    | 1,1                    |
| MMAA200004157 | Ifih1                        | NM_027835     | <b>1,6</b>            | <b>2,8</b>            | 1,1                    | 1,1                    |
| MMAA200002418 | Ifit1                        | NM_008331     | <b>3,7</b>            | <b>3,4</b>            | 1,2                    | 1,0                    |
| MMAA300016271 | Ifit3                        | NM_010501     | <b>5,9</b>            | <b>7,6</b>            | 1,6                    | 1,0                    |
| MMAA200009330 | Ifitm3                       | NM_025378     | <b>2,3</b>            | <b>5,4</b>            | 1,8                    | 1,1                    |
| MMAA200000303 | Iigp2                        | NM_018738     | <b>1,6</b>            | <b>5,1</b>            | 1,2                    | 1,0                    |
| MMAA200001244 | Irf7                         | NM_016850     | <b>1,6</b>            | <b>2,2</b>            | 1,1                    | 1,0                    |
| MMAA200006739 | Irgm                         | NM_008326     | <b>3,0</b>            | <b>7,2</b>            | 1,1                    | 1,0                    |
| MMAA200003721 | Isg20                        | NM_020583     | <b>2,4</b>            | <b>3,3</b>            | 1,0                    | 1,0                    |
| MMAA200000773 | Isgf3g                       | NM_008394     | <b>2,3</b>            | <b>2,1</b>            | 1,0                    | 1,0                    |
| MMAA200001213 | Lgals3bp                     | NM_011150     | <b>3,3</b>            | <b>5,9</b>            | 1,4                    | 1,1                    |
| MMAA200003577 | Lgals9                       | NM_010708     | <b>1,5</b>            | <b>1,8</b>            | 1,0                    | 1,0                    |
| MMAA200002687 | Ly6c                         | NM_010738     | <b>4,2</b>            | <b>8,2</b>            | 1,8                    | 1,0                    |
| MMAA200000279 | Ly6e                         | NM_008529     | <b>1,7</b>            | <b>2,0</b>            | 0,9                    | 1,1                    |
| MMAA200014954 | Ly6f                         | NM_008530     | <b>3,1</b>            | <b>6,8</b>            | 1,2                    | 1,0                    |
| MMAA200003282 | Mx2                          | NM_013606     | <b>2,0</b>            | <b>2,6</b>            | 1,2                    | 0,9                    |
| MMAA300000160 | Oas1g                        | NM_011852     | <b>2,4</b>            | <b>6,2</b>            | 1,2                    | 1,0                    |
| MMAA300006738 | Oasl2                        | NM_011854     | <b>2,8</b>            | <b>4,5</b>            | 1,0                    | 1,0                    |
| MMAA200004993 | Olfir56                      | NM_010999     | <b>2,5</b>            | <b>6,9</b>            | 1,2                    | 1,0                    |
| MMAA300011591 | Parp12                       | NM_172893     | <b>1,6</b>            | <b>2,2</b>            | 1,1                    | 1,0                    |

|               |        |              |            |             |     |     |
|---------------|--------|--------------|------------|-------------|-----|-----|
| MMAA200003254 | Psmb8  | NM_010724    | <b>1,9</b> | <b>4,4</b>  | 1,1 | 1,1 |
| MMAA200000293 | Psme1  | NM_011189    | <b>4,0</b> | <b>2,1</b>  | 1,0 | 1,0 |
| MMAA300018571 | Samd9l | XM_983894    | <b>1,8</b> | <b>4,1</b>  | 1,5 | 1,0 |
| MMAA200002695 | Stat1  | NM_009283    | <b>3,4</b> | <b>5,2</b>  | 1,1 | 1,0 |
| MMAA300010868 | Tap1   | NM_013683    | <b>1,7</b> | <b>5,3</b>  | 1,1 | 1,0 |
| MMAA200003398 | Tgtp   | NM_001045540 | <b>7,3</b> | <b>17,5</b> | 1,9 | 1,1 |
| MMAA200005563 | Tor3a  | NM_023141    | <b>1,5</b> | <b>2,0</b>  | 1,0 | 1,0 |
| MMAA200002067 | Trim25 | NM_009546    | <b>1,9</b> | <b>2,6</b>  | 1,2 | 1,0 |
| MMAA200000426 | Ube1l  | NM_023738    | <b>2,1</b> | <b>2,9</b>  | 1,0 | 1,0 |
| MMAA300005461 | Ube2l6 | NM_019949    | <b>1,5</b> | <b>2,3</b>  | 1,0 | 0,9 |
| MMAA200005576 | Usp18  | NM_011909    | <b>1,9</b> | <b>3,9</b>  | 1,0 | 1,0 |
| MMAA300005673 | Zbp1   | NM_021394    | <b>2,7</b> | <b>6,2</b>  | 1,1 | 1,0 |

---

**Supplementary Table 1B. Late genes (n=64)**

| GeneID        | Common Name        | RefSeq       | BALB/c<br>t=2 | BALB/c<br>t=5 | 129SvEv<br>t=2 | 129SvEv<br>t=5 |
|---------------|--------------------|--------------|---------------|---------------|----------------|----------------|
| MMAA300004129 | 15040              | XM_992574    | 1,4           | <b>1,9</b>    | 1,0            | 1,0            |
| MMAA300007721 | 665536             |              | 1,1           | <b>1,8</b>    | 1,1            | 1,0            |
| MMAA300002618 | 1810023F06Rik      | NM_029803    | 1,4           | <b>2,1</b>    | 1,1            | 0,9            |
| MMAA200003525 | 6620401K05Rik      | NM_172774    | 1,1           | <b>1,8</b>    | 1,1            | 1,0            |
| MMAA300012210 | AI481105           | XM_989905    | 1,4           | <b>1,7</b>    | 0,9            | 1,0            |
| MMAA300006778 | Arpc1b             | NM_023142    | 0,9           | <b>1,9</b>    | 1,0            | 1,1            |
| MMAA200000131 | C1qa               | NM_007572    | 1,3           | <b>2,3</b>    | 1,0            | 1,0            |
| MMAA200000049 | Ccl2               | NM_011333    | 1,0           | <b>7,5</b>    | 1,0            | 1,0            |
| MMAA300009668 | Ccl5               | NM_013653    | 0,9           | <b>2,8</b>    | 1,0            | 1,0            |
| MMAA200003414 | Ccl7               | NM_013654    | 0,9           | <b>2,8</b>    | 1,0            | 1,1            |
| MMAA300004234 | Cd74               | NM_001042605 | 1,0           | <b>2,0</b>    | 1,0            | 0,9            |
| MMAA300000452 | Cp                 | NM_007752    | 1,3           | <b>2,8</b>    | 1,1            | 1,0            |
| MMAA200000242 | Ctsc               | NM_009982    | 1,1           | <b>2,5</b>    | 1,1            | 1,0            |
| MMAA200001409 | Ctss               | NM_021281    | 1,2           | <b>2,0</b>    | 1,1            | 1,0            |
| MMAA200000311 | Cxcl10             | NM_021274    | 1,4           | <b>13,0</b>   | 1,1            | 1,0            |
| MMAA200000272 | Cxcl9              | NM_008599    | 1,0           | <b>2,2</b>    | 1,0            | 1,0            |
| MMAA300009934 | D14Ert668e         | NM_199015    | 1,2           | <b>2,4</b>    | 1,0            | 1,0            |
| MMAA300018596 | ENSMUSG00000063388 |              | 1,1           | <b>2,7</b>    | 1,1            | 1,0            |
| MMAA200004470 | Fcer1g             | NM_010185    | 1,0           | <b>2,5</b>    | 1,1            | 1,1            |
| MMAA200000053 | Fcgr1              | NM_010186    | 1,4           | <b>2,1</b>    | 1,0            | 1,0            |
| MMAA300021278 | Fcgr3a             | NM_144559    | 1,0           | <b>2,1</b>    | 1,0            | 1,0            |
| MMAA200003376 | Gzma               | NM_010370    | 0,9           | <b>2,5</b>    | 1,0            | 1,0            |
| MMAA200003391 | H2-Ea              | NM_010381    | 1,1           | <b>2,1</b>    | 1,1            | 1,0            |
| MMAA200014858 | H2-Q1              |              | 1,1           | <b>1,9</b>    | 1,0            | 1,1            |
| MMAA300010153 | H2-Q9              | NM_010394    | 1,4           | <b>2,4</b>    | 1,1            | 1,1            |
| MMAA200000255 | Hck                | NM_010407    | 1,1           | <b>1,9</b>    | 1,0            | 1,0            |
| MMAA300010905 | Icam1              | NM_010493    | 1,0           | <b>2,7</b>    | 1,0            | 1,0            |
| MMAA300005165 | Ifi205             | NM_001033450 | 1,2           | <b>2,1</b>    | 1,1            | 1,0            |
| MMAA300004660 | Ifitm1             | NM_026820    | 1,0           | <b>2,3</b>    | 1,0            | 1,0            |
| MMAA200000196 | Ifngr1             | NM_010511    | 1,0           | <b>1,6</b>    | 1,1            | 1,0            |
| MMAA200000461 | Irf1               | NM_008390    | 1,4           | <b>6,5</b>    | 1,1            | 1,0            |
| MMAA200001229 | Irf8               | NM_008320    | 1,1           | <b>1,7</b>    | 1,0            | 1,0            |
| MMAA300015119 | Krt18              | NM_010664    | 1,2           | <b>1,6</b>    | 0,9            | 1,1            |
| MMAA300005306 | Lcn2               | NM_008491    | 1,4           | <b>6,8</b>    | 1,0            | 1,1            |
| MMAA300021034 | Lgals3             | NM_010705    | 1,3           | <b>1,8</b>    | 1,0            | 1,0            |
| MMAA300001891 | Lilrb4             | NM_013532    | 1,2           | <b>1,8</b>    | 1,1            | 1,0            |
| MMAA300002751 | Ly86               | NM_010745    | 0,8           | <b>1,9</b>    | 1,0            | 1,0            |
| MMAA300002048 | Lyzs               | NM_017372    | 0,9           | <b>2,5</b>    | 1,0            | 1,0            |
| MMAA300004266 | Ms4a4b             | NM_021718    | 0,9           | <b>1,9</b>    | 1,0            | 1,0            |
| MMAA200006504 | Ms4a6b             | NM_028595    | 1,1           | <b>2,6</b>    | 0,9            | 1,0            |
| MMAA200011666 | Ms4a6d             | NM_026835    | 1,1           | <b>2,5</b>    | 1,1            | 1,0            |
| MMAA200009417 | Mt2                | NM_008630    | 1,0           | <b>1,7</b>    | 1,0            | 0,9            |
| MMAA200007409 | Myct1              | NM_026793    | 0,9           | <b>1,9</b>    | 1,1            | 1,0            |
| MMAA200016125 | Oasl1              | NM_145209    | 1,4           | <b>3,0</b>    | 1,1            | 1,0            |
| MMAA200002994 | Osmr               | NM_011019    | 1,0           | <b>1,7</b>    | 1,0            | 1,1            |

|               |             |              |     |            |     |     |
|---------------|-------------|--------------|-----|------------|-----|-----|
| MMAA300009340 | Parp14      | NM_001039530 | 1,2 | <b>2,2</b> | 1,1 | 1,0 |
| MMAA300015703 | Phf11       | NM_172603    | 1,4 | <b>3,1</b> | 1,2 | 1,0 |
| MMAA200007618 | Plac8       | NM_139198    | 1,0 | <b>2,9</b> | 1,1 | 1,0 |
| MMAA200013018 | Plec1       | XM_993494    | 1,3 | <b>2,6</b> | 1,0 | 1,0 |
| MMAA200000278 | Psmb10      | NM_013640    | 1,2 | <b>2,3</b> | 1,0 | 1,0 |
| MMAA200003424 | Psmb9       | NM_013585    | 1,4 | <b>4,0</b> | 1,1 | 1,0 |
| MMAA300018890 | Psme1       | NM_011189    | 1,0 | <b>2,1</b> | 1,2 | 1,0 |
| MMAA200003295 | Saa3        | NM_011315    | 1,0 | <b>5,0</b> | 1,0 | 1,0 |
| MMAA200012660 | Samhd1      | NM_018851    | 1,3 | <b>2,1</b> | 1,0 | 1,0 |
| MMAA200008133 | Serping1    | NM_009776    | 1,0 | <b>2,2</b> | 1,1 | 1,0 |
| MMAA200000042 | Socs1       | NM_009896    | 1,1 | <b>1,5</b> | 1,2 | 1,0 |
| MMAA200004256 | Stat2       | NM_019963    | 1,2 | <b>1,9</b> | 0,9 | 1,0 |
| MMAA200003694 | Tgm2        | NM_009373    | 1,3 | <b>2,5</b> | 1,0 | 0,9 |
| MMAA300000154 | Timp1       | NM_011593    | 1,0 | <b>1,9</b> | 1,0 | 1,0 |
| MMAA200015882 | Tlr2        | NM_011905    | 1,0 | <b>2,3</b> | 1,1 | 1,0 |
| MMAA200000616 | Tspo        | NM_009775    | 1,0 | <b>2,0</b> | 1,0 | 1,0 |
| MMAA300002295 | Tyki        | NM_020557    | 1,4 | <b>2,0</b> | 1,0 | 1,0 |
| MMAA300017681 | XR_003396.1 | XM_924014    | 1,3 | <b>2,4</b> | 1,1 | 1,1 |
| MMAA300015120 | XR_005070.1 | XR_005070    | 1,1 | <b>1,6</b> | 1,0 | 1,0 |

---
