# Supplementary material for: Type I interferon receptor-independent and -dependent host transcriptional responses to mouse hepatitis coronavirus infection in vivo
Source: PubMed Central journal article supplement (PMC2728740; doi:10.1186/1471-2164-10-350), 2009-08-03
Supplement: 1471-2164-10-350-S2.pdf [file 1471-2164-10-350-S2.pdf]

**Supplementary Table 2. Differentially expressed genes per BALB/c mouse (n=96)**

| GeneID        | Common Name                  | RefSeq       | Mouse 1 | Mouse 2 | Mouse 3 | Mouse 4 |
|---------------|------------------------------|--------------|---------|---------|---------|---------|
| MMAA300004126 | 69717                        | XM_001003852 | 3,3     | 1,7     | 4,6     | 1,5     |
| MMAA300002620 | 1810023F06Rik                | NM_029803    | 3,3     | 20,8    | 3,4     | 14,1    |
| MMAA300008745 | B2m                          | NM_009735    | 2,5     | 10,0    | 2,7     | 6,4     |
| MMAA300017604 | Bst2                         | NM_198095    | 2,2     | 2,4     | 2,0     | 2,0     |
| MMAA200000131 | C1qa                         | NM_007572    | 2,3     | 2,7     | 1,8     | 2,3     |
| MMAA300009870 | Ccl12                        | NM_011331    | 2,9     | 15,1    | 2,4     | 16,8    |
| MMAA200000049 | Ccl2                         | NM_011333    | 3,7     | 14,5    | 2,1     | 9,7     |
| MMAA300009668 | Ccl5                         | NM_013653    | 1,5     | 5,0     | 1,4     | 3,3     |
| MMAA200003414 | Ccl7                         | NM_013654    | 1,4     | 5,2     | 0,9     | 3,8     |
| MMAA300004234 | Cd74                         | NM_001042605 | 1,1     | 3,0     | 1,4     | 2,5     |
| MMAA300000452 | Cp                           | NM_007752    | 0,6     | 5,3     | 0,6     | 4,5     |
| MMAA200000242 | Ctsc                         | NM_009982    | 1,3     | 4,3     | 1,3     | 3,0     |
| MMAA200001409 | Ctss                         | NM_021281    | 1,9     | 2,5     | 1,7     | 1,9     |
| MMAA200000311 | Cxcl10                       | NM_021274    | 6,6     | 22,5    | 6,0     | 17,1    |
| MMAA200009050 | Cxcl11                       | NM_019494    | 3,2     | 9,8     | 2,9     | 8,3     |
| MMAA200000272 | Cxcl9                        | NM_008599    | 1,2     | 3,6     | 1,0     | 2,7     |
| MMAA300012414 | D11Ertd759e                  | NM_001040005 | 1,4     | 4,6     | 1,4     | 4,1     |
| MMAA200000807 | D12Ertd647e                  | NM_026790    | 3,6     | 2,3     | 4,1     | 2,2     |
| MMAA300009934 | D14Ertd668e                  | NM_199015    | 1,2     | 4,3     | 1,1     | 3,2     |
| MMAA300004057 | ENSMUSESTG00003733703        |              | 1,7     | 4,1     | 1,9     | 2,6     |
| MMAA300012450 | ENSMUSG00000039955           |              | 2,7     | 3,9     | 3,1     | 3,2     |
| MMAA300018596 | ENSMUSG00000063388           |              | 1,6     | 4,2     | 1,7     | 3,3     |
| MMAA300012693 | Fbxo39                       | NM_001037713 | 1,6     | 4,7     | 1,4     | 3,7     |
| MMAA200004470 | Fcer1g                       | NM_010185    | 2,1     | 3,1     | 2,0     | 2,6     |
| MMAA200000053 | Fcgr1                        | NM_010186    | 1,9     | 2,5     | 1,7     | 2,2     |
| MMAA300021278 | Fcgr3a                       | NM_144559    | 1,3     | 3,0     | 1,3     | 2,8     |
| MMAA200000089 | Gbp1                         | NM_010259    | 3,4     | 10,5    | 4,1     | 6,2     |
| MMAA200004765 | Gbp2                         | NM_010260    | 2,9     | 4,2     | 3,2     | 6,2     |
| MMAA200000729 | Gbp3                         | NM_018734    | 3,0     | 8,9     | 2,8     | 7,3     |
| MMAA300006597 | Gbp4                         | NM_029509    | 1,0     | 10,6    | 1,5     | 6,1     |
| MMAA300017406 | genomic:17-45870359-45870428 |              | 7,0     | 10,1    | 9,4     | 6,6     |
| MMAA200003376 | Gzma                         | NM_010370    | 1,0     | 5,2     | 1,1     | 2,8     |
| MMAA300011983 | H28                          | NM_031367    | 1,8     | 2,7     | 1,6     | 2,3     |
| MMAA200003391 | H2-Ea                        | NM_010381    | 0,9     | 3,8     | 1,1     | 2,6     |
| MMAA300004062 | H2-K1                        | NM_019909    | 3,1     | 7,8     | 3,5     | 5,3     |
| MMAA300012864 | H2-Q1                        |              | 2,7     | 3,7     | 2,9     | 3,3     |
| MMAA300010152 | H2-Q10                       | NM_010391    | 3,7     | 2,4     | 5,8     | 1,3     |
| MMAA300010147 | H2-Q8                        | NM_023124    | 2,8     | 2,4     | 2,0     | 1,6     |
| MMAA300010153 | H2-Q9                        | NM_010394    | 2,0     | 3,0     | 2,4     | 2,2     |
| MMAA300006884 | Herc5                        | XM_978982    | 1,3     | 4,5     | 1,1     | 2,8     |
| MMAA300010905 | Icam1                        | NM_010493    | 2,9     | 2,3     | 3,1     | 2,4     |
| MMAA300005162 | Ifi202b                      | NM_008327    | 0,8     | 15,3    | 0,7     | 11,9    |
| MMAA300005166 | Ifi204                       | NM_008329    | 1,4     | 9,2     | 1,3     | 8,7     |
| MMAA300005165 | Ifi205                       | NM_001033450 | 1,5     | 3,7     | 0,8     | 2,2     |
| MMAA200006998 | Ifi44                        | NM_133871    | 2,1     | 11,9    | 1,8     | 10,1    |

|               |          |              |      |      |      |      |
|---------------|----------|--------------|------|------|------|------|
| MMAA200004157 | Ifih1    | NM_027835    | 1,2  | 4,6  | 1,3  | 4,0  |
| MMAA200002418 | Ifit1    | NM_008331    | 2,4  | 4,6  | 2,3  | 4,5  |
| MMAA300016271 | Ifit3    | NM_010501    | 2,9  | 13,3 | 2,7  | 11,3 |
| MMAA300004660 | Ifitm1   | NM_026820    | 2,1  | 3,1  | 2,0  | 1,9  |
| MMAA200009330 | Ifitm3   | NM_025378    | 3,4  | 7,9  | 4,0  | 6,3  |
| MMAA200000303 | Iigp2    | NM_018738    | 3,2  | 7,4  | 3,1  | 6,5  |
| MMAA200000461 | Irf1     | NM_008390    | 2,8  | 12,5 | 2,5  | 8,0  |
| MMAA200001244 | Irf7     | NM_016850    | 2,0  | 2,4  | 2,5  | 2,0  |
| MMAA200006739 | Irgm     | NM_008326    | 2,9  | 13,7 | 2,8  | 9,6  |
| MMAA200003721 | Isg20    | NM_020583    | 5,3  | 1,9  | 3,8  | 2,2  |
| MMAA200000773 | Isgf3g   | NM_008394    | 1,8  | 2,8  | 1,9  | 2,0  |
| MMAA300005306 | Lcn2     | NM_008491    | 1,8  | 13,2 | 2,8  | 9,4  |
| MMAA200001213 | Lgals3bp | NM_011150    | 3,4  | 8,2  | 3,9  | 8,0  |
| MMAA200002687 | Ly6c     | NM_010738    | 5,0  | 13,2 | 5,2  | 9,3  |
| MMAA200000279 | Ly6e     | NM_008529    | 2,2  | 2,1  | 1,7  | 2,1  |
| MMAA200014954 | Ly6f     | NM_008530    | 3,4  | 11,7 | 3,7  | 8,3  |
| MMAA300002048 | Lyzs     | NM_017372    | 2,0  | 3,0  | 2,2  | 2,7  |
| MMAA200006504 | Ms4a6b   | NM_028595    | 1,1  | 5,0  | 1,0  | 3,5  |
| MMAA200011666 | Ms4a6d   | NM_026835    | 1,7  | 4,1  | 1,5  | 2,7  |
| MMAA200003282 | Mx2      | NM_013606    | 1,3  | 4,4  | 1,1  | 3,5  |
| MMAA300000160 | Oas1g    | NM_011852    | 3,2  | 9,9  | 3,9  | 7,7  |
| MMAA200016125 | Oas1l    | NM_145209    | 1,7  | 4,9  | 1,4  | 4,0  |
| MMAA300006738 | Oas12    | NM_011854    | 5,8  | 2,7  | 7,2  | 2,3  |
| MMAA200004993 | Olf156   | NM_010999    | 3,2  | 13,3 | 1,9  | 9,3  |
| MMAA300011591 | Parp12   | NM_172893    | 1,3  | 3,4  | 1,2  | 2,9  |
| MMAA300009340 | Parp14   | NM_001039530 | 1,4  | 3,1  | 1,4  | 2,7  |
| MMAA300015703 | Phf11    | NM_172603    | 1,0  | 5,8  | 0,7  | 4,8  |
| MMAA200007618 | Plac8    | NM_139198    | 2,2  | 3,6  | 2,9  | 3,0  |
| MMAA200013018 | Plec1    | XM_993494    | 1,4  | 4,0  | 1,6  | 3,4  |
| MMAA200000278 | Psmb10   | NM_013640    | 1,8  | 3,4  | 1,7  | 2,2  |
| MMAA200003254 | Psmb8    | NM_010724    | 3,0  | 7,2  | 3,1  | 4,3  |
| MMAA200003424 | Psmb9    | NM_013585    | 1,6  | 7,4  | 1,7  | 5,2  |
| MMAA200000293 | Psme1    | NM_011189    | 1,7  | 2,7  | 1,8  | 2,1  |
| MMAA200003295 | Saa3     | NM_011315    | 1,7  | 9,8  | 2,2  | 6,2  |
| MMAA300018571 | Samd9l   | XM_983894    | 1,5  | 8,8  | 1,1  | 5,1  |
| MMAA200012660 | Samhd1   | NM_018851    | 0,7  | 3,9  | 0,6  | 3,2  |
| MMAA200008133 | Serping1 | NM_009776    | 1,0  | 4,2  | 1,0  | 2,8  |
| MMAA200002695 | Stat1    | NM_009283    | 2,4  | 8,4  | 2,7  | 7,5  |
| MMAA300010868 | Tap1     | NM_013683    | 2,0  | 10,4 | 1,7  | 7,2  |
| MMAA200003694 | Tgm2     | NM_009373    | 1,3  | 4,2  | 1,2  | 3,3  |
| MMAA200003398 | Tgtp     | NM_001045540 | 10,1 | 26,7 | 10,7 | 22,5 |
| MMAA200015882 | Tlr2     | NM_011905    | 1,3  | 3,4  | 1,3  | 3,1  |
| MMAA200005563 | Tor3a    | NM_023141    | 1,4  | 2,4  | 2,0  | 2,2  |
| MMAA200002067 | Trim25   | NM_009546    | 1,7  | 3,8  | 1,7  | 3,4  |
| MMAA200000616 | Tspo     | NM_009775    | 2,0  | 2,6  | 1,9  | 1,6  |
| MMAA300002295 | Tyki     | NM_020557    | 2,0  | 2,0  | 2,1  | 1,9  |
| MMAA200000426 | Ube1l    | NM_023738    | 1,5  | 4,5  | 1,4  | 4,1  |
| MMAA300005461 | Ube2l6   | NM_019949    | 1,6  | 3,2  | 1,5  | 2,8  |

|               |             |           |     |      |     |     |
|---------------|-------------|-----------|-----|------|-----|-----|
| MMAA200005576 | Usp18       | NM_011909 | 2,8 | 5,9  | 2,2 | 4,7 |
| MMAA300017681 | XR_003396.1 | XM_924014 | 1,7 | 3,7  | 1,8 | 2,6 |
| MMAA300005673 | Zbp1        | NM_021394 | 2,2 | 12,2 | 1,7 | 8,6 |

---
