# Supplementary material for: Type I interferon receptor-independent and -dependent host transcriptional responses to mouse hepatitis coronavirus infection in vivo
Source: PubMed Central journal article supplement (PMC2728740; doi:10.1186/1471-2164-10-350), 2009-08-03
Supplement: 1471-2164-10-350-S3.pdf [file 1471-2164-10-350-S3.pdf]

**Supplementary Table 3. Type I IFN-independent genes (n=73)**

| <b>GeneID</b> | <b>Common Name</b> | <b>RefSeq</b> | <b>129SvEv<br/>t=2</b> | <b>129SvEv<br/>t=5</b> | <b>IFNAR<br/>t=2</b> | <b>IFNAR<br/>t=5</b> |
|---------------|--------------------|---------------|------------------------|------------------------|----------------------|----------------------|
| MMAA300018417 | 665509             |               | 1,1                    | 1,0                    | 1,1                  | <b>1,5</b>           |
| MMAA200000796 | Apod               | NM_007470     | 1,2                    | 1,0                    | 1,0                  | <b>2,0</b>           |
| MMAA300006778 | Arpc1b             | NM_023142     | 1,0                    | 1,1                    | 1,0                  | <b>1,6</b>           |
| MMAA200004830 | Arrdc2             | NM_027560     | 1,0                    | 1,0                    | 1,0                  | <b>1,8</b>           |
| MMAA300008745 | B2m                | NM_009735     | 1,3                    | 1,2                    | 1,0                  | <b>4,1</b>           |
| MMAA200000131 | C1qa               | NM_007572     | 1,0                    | 1,0                    | 0,9                  | <b>2,1</b>           |
| MMAA200000979 | C1qb               | NM_009777     | 1,0                    | 1,0                    | 1,0                  | <b>3,1</b>           |
| MMAA200001340 | C1qc               | NM_007574     | 1,1                    | 1,0                    | 1,0                  | <b>2,0</b>           |
| MMAA300004234 | Cd74               | NM_001042605  | 1,0                    | 0,9                    | 1,0                  | <b>3,8</b>           |
| MMAA200007578 | Cdkn1a             | NM_007669     | 1,0                    | 1,0                    | 1,0                  | <b>2,1</b>           |
| MMAA300012869 | Chi3l3             | XM_889251     | 1,1                    | 1,0                    | 1,0                  | <b>3,3</b>           |
| MMAA300000452 | Cp                 | NM_007752     | 1,1                    | 1,0                    | 0,9                  | <b>2,3</b>           |
| MMAA200009050 | Cxcl11             | NM_019494     | 1,0                    | 1,0                    | 1,0                  | <b>1,6</b>           |
| MMAA300001385 | Cyp2j9             | NM_028979     | 0,9                    | 0,9                    | 1,0                  | <b>1,6</b>           |
| MMAA300012450 | ENSMUSG00000039955 |               | 1,3                    | 1,0                    | 1,0                  | <b>2,1</b>           |
| MMAA200001345 | Fit1               | NM_010228     | 1,1                    | 1,1                    | 1,0                  | <b>1,6</b>           |
| MMAA200000089 | Gbp1               | NM_010259     | 1,1                    | 1,0                    | 1,0                  | <b>3,2</b>           |
| MMAA200004765 | Gbp2               | NM_010260     | 1,1                    | 1,0                    | 1,0                  | <b>2,3</b>           |
| MMAA200000729 | Gbp3               | NM_018734     | 1,3                    | 1,1                    | 1,1                  | <b>1,9</b>           |
| MMAA200005744 | Gdpd3              | NM_024228     | 1,1                    | 1,0                    | 1,0                  | <b>1,6</b>           |
| MMAA200000881 | Glul               | NM_008131     | 1,0                    | 1,0                    | 0,9                  | <b>1,6</b>           |
| MMAA300020817 | Grrp1              | XM_485455     | 0,9                    | 1,0                    | 1,0                  | <b>1,5</b>           |
| MMAA200000761 | Gstm1              | NM_010358     | 1,0                    | 0,9                    | 1,0                  | <b>1,5</b>           |
| MMAA300010457 | H2-Aa              | NM_010378     | 1,3                    | 0,9                    | 1,0                  | <b>1,9</b>           |
| MMAA300004076 | H2-Eb1             | NM_010382     | 1,1                    | 1,0                    | 1,0                  | <b>1,7</b>           |
| MMAA300004062 | H2-K1              | NM_019909     | 1,1                    | 1,2                    | 1,0                  | <b>2,8</b>           |
| MMAA300012864 | H2-Q1              |               | 1,1                    | 1,1                    | 1,0                  | <b>1,7</b>           |
| MMAA300010153 | H2-Q9              | NM_010394     | 1,1                    | 1,1                    | 1,0                  | <b>1,6</b>           |
| MMAA200005712 | Hexb               | NM_010422     | 1,1                    | 1,0                    | 1,1                  | <b>1,5</b>           |
| MMAA300017926 | Hspb1              | NM_013560     | 1,1                    | 1,0                    | 1,1                  | <b>1,6</b>           |
| MMAA300005162 | Ifi202b            | NM_008327     | 1,5                    | 1,2                    | 1,3                  | <b>1,5</b>           |
| MMAA300004660 | Ifitm1             | NM_026820     | 1,0                    | 1,0                    | 1,1                  | <b>2,2</b>           |
| MMAA200009330 | Ifitm3             | NM_025378     | 1,8                    | 1,1                    | 1,1                  | <b>3,0</b>           |
| MMAA200000196 | Ifngr1             | NM_010511     | 1,0                    | 1,0                    | 1,0                  | <b>1,6</b>           |
| MMAA200000191 | Igfbp7             | NM_008048     | 1,0                    | 1,0                    | 1,1                  | <b>2,1</b>           |
| MMAA200000303 | Iigp2              | NM_018738     | 1,2                    | 1,0                    | 1,0                  | <b>1,8</b>           |
| MMAA200000461 | Irf1               | NM_008390     | 1,1                    | 1,0                    | 1,1                  | <b>1,9</b>           |
| MMAA300015119 | Krt18              | NM_010664     | 0,9                    | 1,1                    | 1,0                  | <b>2,2</b>           |
| MMAA300005306 | Lcn2               | NM_008491     | 1,0                    | 1,1                    | 1,1                  | <b>2,9</b>           |
| MMAA200001213 | Lgals3bp           | NM_011150     | 1,4                    | 1,1                    | 1,0                  | <b>1,5</b>           |
| MMAA200011815 | Lrg1               | NM_029796     | 1,0                    | 1,0                    | 1,1                  | <b>1,6</b>           |
| MMAA200002687 | Ly6c               | NM_010738     | 1,8                    | 1,0                    | 1,0                  | <b>6,6</b>           |
| MMAA200014954 | Ly6f               | NM_008530     | 1,2                    | 1,0                    | 1,0                  | <b>3,4</b>           |
| MMAA300002048 | Lyzs               | NM_017372     | 1,0                    | 1,0                    | 1,0                  | <b>4,2</b>           |
| MMAA300002047 | Lzp-s              | NM_013590     | 1,0                    | 1,0                    | 1,0                  | <b>1,8</b>           |

|               |             |              |     |     |     |             |
|---------------|-------------|--------------|-----|-----|-----|-------------|
| MMAA300007075 | Mgp         | NM_008597    | 1,1 | 1,0 | 1,0 | <b>1,9</b>  |
| MMAA200006504 | Ms4a6b      | NM_028595    | 0,9 | 1,0 | 1,0 | <b>1,6</b>  |
| MMAA300007885 | Mt1         | NM_013602    | 1,0 | 0,9 | 1,1 | <b>2,5</b>  |
| MMAA200009417 | Mt2         | NM_008630    | 1,0 | 0,9 | 1,0 | <b>2,3</b>  |
| MMAA300007883 | Mt3         | NM_013603    | 1,1 | 0,9 | 1,2 | <b>1,5</b>  |
| MMAA200004993 | Olf45       | NM_010999    | 1,2 | 1,0 | 1,0 | <b>2,2</b>  |
| MMAA300000072 | Phyh1       | NM_177725    | 1,0 | 1,0 | 1,2 | <b>3,1</b>  |
| MMAA200007618 | Plac8       | NM_139198    | 1,1 | 1,0 | 1,0 | <b>1,5</b>  |
| MMAA200016029 | Podxl       | NM_013723    | 1,1 | 1,0 | 1,1 | <b>1,6</b>  |
| MMAA200003254 | Psmc8       | NM_010724    | 1,1 | 1,1 | 1,0 | <b>2,1</b>  |
| MMAA200003424 | Psmc9       | NM_013585    | 1,1 | 1,0 | 1,0 | <b>2,0</b>  |
| MMAA300005843 | S100a11     | NM_016740    | 1,0 | 1,1 | 1,2 | <b>1,6</b>  |
| MMAA200003295 | Saa3        | NM_011315    | 1,0 | 1,0 | 1,1 | <b>2,0</b>  |
| MMAA200003167 | Scrg1       | NM_009136    | 1,0 | 1,0 | 1,0 | <b>1,5</b>  |
| MMAA200003360 | Serpina3g   | NM_009251    | 1,0 | 1,0 | 1,0 | <b>1,8</b>  |
| MMAA300001921 | Sgk         | NM_011361    | 0,9 | 1,1 | 1,0 | <b>1,5</b>  |
| MMAA300006210 | Slc2a1      | NM_011400    | 1,0 | 1,0 | 1,0 | <b>1,6</b>  |
| MMAA300004422 | Sorbs1      | NM_178362    | 1,1 | 1,0 | 1,0 | <b>1,5</b>  |
| MMAA200002695 | Stat1       | NM_009283    | 1,1 | 1,0 | 1,0 | <b>1,5</b>  |
| MMAA200003495 | Sult1a1     | NM_133670    | 0,9 | 1,1 | 1,1 | <b>3,3</b>  |
| MMAA200003694 | Tgm2        | NM_009373    | 1,0 | 0,9 | 1,0 | <b>2,5</b>  |
| MMAA200003398 | Tgtp        | NM_001045540 | 1,9 | 1,1 | 1,0 | <b>13,1</b> |
| MMAA200006098 | Tm2d2       | NM_027194    | 1,1 | 0,9 | 1,3 | <b>2,7</b>  |
| MMAA300007712 | Tsc22d3     | NM_010286    | 1,0 | 1,0 | 1,0 | <b>2,0</b>  |
| MMAA200009290 | Ubd         | NM_023137    | 1,0 | 1,0 | 1,0 | <b>1,8</b>  |
| MMAA300017681 | XR_003396.1 | XM_924014    | 1,1 | 1,1 | 1,0 | <b>1,9</b>  |
| MMAA300015120 | XR_005070.1 | XR_005070    | 1,0 | 1,0 | 1,0 | <b>1,8</b>  |
| MMAA200003752 | Zfp113      | NM_019747    | 1,0 | 1,0 | 1,0 | <b>1,5</b>  |
