# Supplementary material for: Type I interferon receptor-independent and -dependent host transcriptional responses to mouse hepatitis coronavirus infection in vivo
Source: PubMed Central journal article supplement (PMC2728740; doi:10.1186/1471-2164-10-350), 2009-08-03
Supplement: 1471-2164-10-350-S4.pdf [file 1471-2164-10-350-S4.pdf]

**Supplementary Table 4. Tentative type I IFN-dependent genes (n=82)**

| GeneID        | Common Name                      | RefSeq       | BALB/c<br>t=5 | IFNAR<br>t=5 | Ratio |
|---------------|----------------------------------|--------------|---------------|--------------|-------|
| MMAA300004129 | 15040                            | XM_992574    | <b>1,9</b>    | 1,0          | 1,8   |
| MMAA300004126 | 69717                            | XM_001003852 | <b>2,5</b>    | 1,0          | 2,5   |
| MMAA300002618 | 1810023F06Rik                    | NM_029803    | <b>1,8</b>    | 1,1          | 1,6   |
| MMAA200003525 | 6620401K05Rik                    | NM_172774    | <b>1,7</b>    | 1,1          | 1,6   |
| MMAA300012210 | AI481105                         | XM_989905    | <b>1,7</b>    | 0,9          | 1,8   |
| MMAA300017604 | Bst2                             | NM_198095    | <b>2,1</b>    | 1,0          | 2,1   |
| MMAA300009870 | Ccl12                            | NM_011331    | <b>6,5</b>    | 1,4          | 4,6   |
| MMAA200000049 | Ccl2                             | NM_011333    | <b>5,8</b>    | 1,1          | 5,1   |
| MMAA300009668 | Ccl5                             | NM_013653    | <b>2,4</b>    | 1,1          | 2,1   |
| MMAA200003414 | Ccl7                             | NM_013654    | <b>2,3</b>    | 1,0          | 2,3   |
| MMAA200000242 | Ctsc                             | NM_009982    | <b>2,2</b>    | 1,3          | 1,7   |
| MMAA200000311 | Cxcl10                           | NM_021274    | <b>11,1</b>   | 1,3          | 8,6   |
| MMAA200009050 | Cxcl11                           | NM_019494    | <b>6,1</b>    | <b>1,6</b>   | 3,7   |
| MMAA200000272 | Cxcl9                            | NM_008599    | <b>1,9</b>    | 1,1          | 1,7   |
| MMAA300012414 | D11Erttd759e                     | NM_001040005 | <b>2,4</b>    | 1,2          | 2,1   |
| MMAA200000807 | D12Erttd647e                     | NM_026790    | <b>2,9</b>    | 1,0          | 2,8   |
| MMAA300009934 | D14Erttd668e                     | NM_199015    | <b>2,0</b>    | 1,0          | 2,0   |
| MMAA300004057 | ENSMUSESTG00003733703            |              | <b>2,4</b>    | 1,4          | 1,8   |
| MMAA300012693 | Fbxo39                           | NM_001037713 | <b>2,5</b>    | 1,0          | 2,4   |
| MMAA200000053 | Fcgr1                            | NM_010186    | <b>2,1</b>    | 1,1          | 1,9   |
| MMAA300021278 | Fcgr3a                           | NM_144559    | <b>2,0</b>    | 1,1          | 1,8   |
| MMAA200000729 | Gbp3                             | NM_018734    | <b>5,5</b>    | <b>1,9</b>   | 2,9   |
| MMAA300006597 | Gbp4                             | NM_029509    | <b>3,1</b>    | 1,2          | 2,7   |
| MMAA300017406 | genomic:17-45870359-<br>45870428 |              | <b>8,1</b>    | 1,1          | 7,3   |
| MMAA200003376 | Gzma                             | NM_010370    | <b>2,0</b>    | 1,0          | 2,0   |
| MMAA300011983 | H28                              | NM_031367    | <b>2,0</b>    | 1,0          | 2,0   |
| MMAA200003391 | H2-Ea                            | NM_010381    | <b>1,8</b>    | 1,1          | 1,6   |
| MMAA300004061 | H2-K1                            | NM_019909    | <b>3,3</b>    | 1,2          | 2,7   |
| MMAA300010152 | H2-Q10                           | NM_010391    | <b>2,9</b>    | 1,2          | 2,5   |
| MMAA300010147 | H2-Q8                            | NM_023124    | <b>2,2</b>    | 1,0          | 2,2   |
| MMAA300006884 | Herc5                            | XM_978982    | <b>2,1</b>    | 1,1          | 1,9   |
| MMAA300010905 | Icam1                            | NM_010493    | <b>2,7</b>    | 1,4          | 1,8   |
| MMAA300005162 | Ifi202b                          | NM_008327    | <b>7,2</b>    | 1,5          | 4,8   |
| MMAA300005166 | Ifi204                           | NM_008329    | <b>3,5</b>    | 1,1          | 3,2   |
| MMAA300005165 | Ifi205                           | NM_001033450 | <b>1,8</b>    | 1,1          | 1,7   |
| MMAA200006998 | Ifi44                            | NM_133871    | <b>4,6</b>    | 1,1          | 4,2   |
| MMAA200004157 | Ifih1                            | NM_027835    | <b>2,3</b>    | 1,0          | 2,2   |
| MMAA200002418 | Ifit1                            | NM_008331    | <b>3,3</b>    | 1,2          | 2,7   |
| MMAA300016271 | Ifit3                            | NM_010501    | <b>5,9</b>    | 1,2          | 4,8   |
| MMAA200000303 | Iigp2                            | NM_018738    | <b>5,1</b>    | <b>1,8</b>   | 2,8   |
| MMAA200000461 | Irf1                             | NM_008390    | <b>6,5</b>    | <b>1,9</b>   | 3,5   |
| MMAA200001244 | Irf7                             | NM_016850    | <b>2,2</b>    | 1,1          | 2,1   |
| MMAA200003721 | Isg20                            | NM_020583    | <b>3,0</b>    | 1,0          | 3,1   |
| MMAA200000773 | Isgf3g                           | NM_008394    | <b>2,1</b>    | 1,1          | 1,9   |
| MMAA300005306 | Lcn2                             | NM_008491    | <b>6,8</b>    | <b>2,9</b>   | 2,3   |

|               |          |              |            |            |     |
|---------------|----------|--------------|------------|------------|-----|
| MMAA300021034 | Lgals3   | NM_010705    | <b>1,8</b> | 1,1        | 1,7 |
| MMAA200001213 | Lgals3bp | NM_011150    | <b>5,9</b> | 1,5        | 3,8 |
| MMAA200003577 | Lgals9   | NM_010708    | <b>1,8</b> | 1,1        | 1,6 |
| MMAA300001891 | Lilrb4   | NM_013532    | <b>1,7</b> | 1,1        | 1,5 |
| MMAA200000279 | Ly6e     | NM_008529    | <b>2,0</b> | 1,2        | 1,7 |
| MMAA200014954 | Ly6f     | NM_008530    | <b>6,8</b> | <b>3,4</b> | 2,0 |
| MMAA300004266 | Ms4a4b   | NM_021718    | <b>1,9</b> | 1,0        | 1,8 |
| MMAA200006504 | Ms4a6b   | NM_028595    | <b>2,6</b> | 1,6        | 1,7 |
| MMAA200011666 | Ms4a6d   | NM_026835    | <b>2,3</b> | 1,1        | 2,1 |
| MMAA200003282 | Mx2      | NM_013606    | <b>2,2</b> | 1,0        | 2,2 |
| MMAA200007409 | Myct1    | NM_026793    | <b>1,7</b> | 1,0        | 1,7 |
| MMAA300000160 | Oas1g    | NM_011852    | <b>5,5</b> | 1,1        | 5,0 |
| MMAA200016125 | Oasl1    | NM_145209    | <b>2,6</b> | 1,0        | 2,7 |
| MMAA300006738 | Oasl2    | NM_011854    | <b>4,0</b> | 1,0        | 4,1 |
| MMAA200004993 | Olfir56  | NM_010999    | <b>6,9</b> | <b>2,2</b> | 3,2 |
| MMAA300011591 | Parp12   | NM_172893    | <b>2,0</b> | 1,1        | 1,8 |
| MMAA300009340 | Parp14   | NM_001039530 | <b>2,0</b> | 1,1        | 1,8 |
| MMAA300015703 | Phf11    | NM_172603    | <b>2,1</b> | 1,2        | 1,7 |
| MMAA200007618 | Plac8    | NM_139198    | <b>2,9</b> | 1,5        | 2,0 |
| MMAA200013018 | Plec1    | XM_993494    | <b>2,3</b> | 1,3        | 1,8 |
| MMAA200000278 | Psmb10   | NM_013640    | <b>2,2</b> | 1,0        | 2,1 |
| MMAA200003254 | Psmb8    | NM_010724    | <b>4,4</b> | <b>2,1</b> | 2,1 |
| MMAA200003424 | Psmb9    | NM_013585    | <b>4,0</b> | <b>2,0</b> | 2,0 |
| MMAA300003147 | Psme1    | NM_011189    | <b>1,9</b> | 1,0        | 1,8 |
| MMAA200003295 | Saa3     | NM_011315    | <b>5,0</b> | <b>2,0</b> | 2,5 |
| MMAA300018571 | Samd9l   | XM_983894    | <b>3,0</b> | 1,2        | 2,5 |
| MMAA200002695 | Stat1    | NM_009283    | <b>5,2</b> | <b>1,5</b> | 3,6 |
| MMAA200004256 | Stat2    | NM_019963    | <b>1,9</b> | 1,0        | 1,9 |
| MMAA300000154 | Timp1    | NM_011593    | <b>1,9</b> | 1,0        | 1,8 |
| MMAA200015882 | Tlr2     | NM_011905    | <b>2,1</b> | 1,1        | 1,9 |
| MMAA200005563 | Tor3a    | NM_023141    | <b>2,0</b> | 1,1        | 1,9 |
| MMAA200002067 | Trim25   | NM_009546    | <b>2,5</b> | 1,2        | 2,1 |
| MMAA200000616 | Tspo     | NM_009775    | <b>2,0</b> | 1,2        | 1,6 |
| MMAA300002295 | Tyki     | NM_020557    | <b>2,0</b> | 0,9        | 2,1 |
| MMAA200000426 | Ube11    | NM_023738    | <b>2,5</b> | 1,1        | 2,3 |
| MMAA300005461 | Ube216   | NM_019949    | <b>2,2</b> | 1,1        | 2,1 |
| MMAA200005576 | Usp18    | NM_011909    | <b>3,6</b> | 0,9        | 3,8 |
| MMAA300005673 | Zbp1     | NM_021394    | <b>4,4</b> | 1,2        | 3,6 |
